# Supplementary material
Source: MDPI journal article supplement (https://www.mdpi.com/2071-1050/15/16/12295)
Supplement: s1 [file s1]

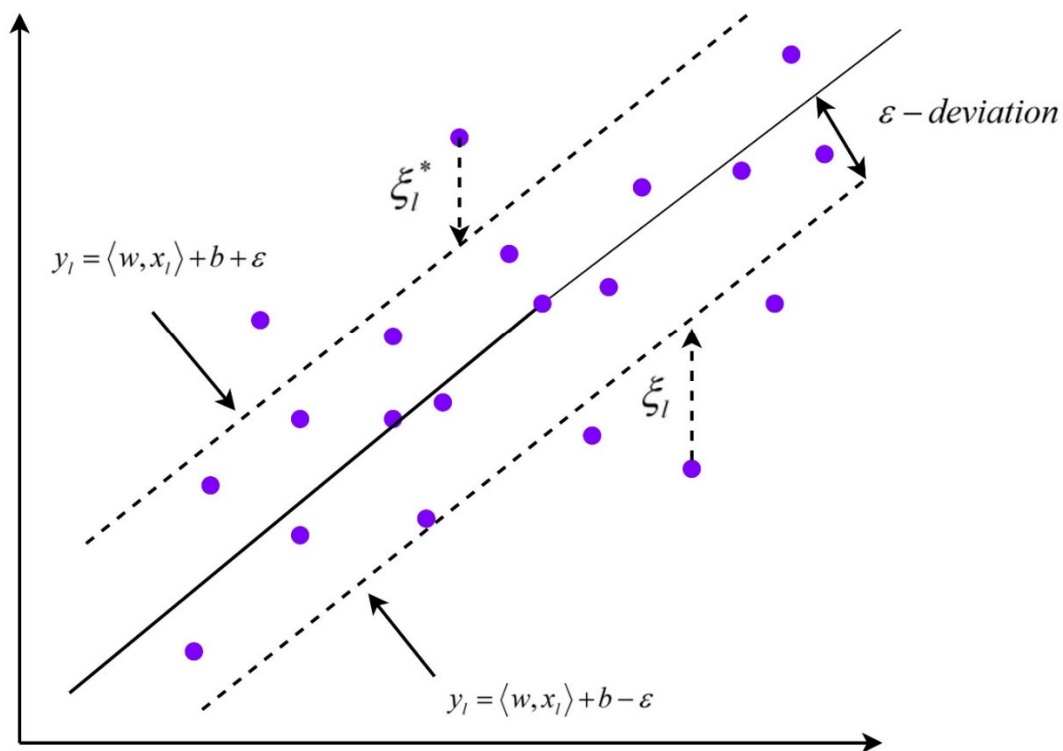

Figure S1. Schematic diagram of SVR.

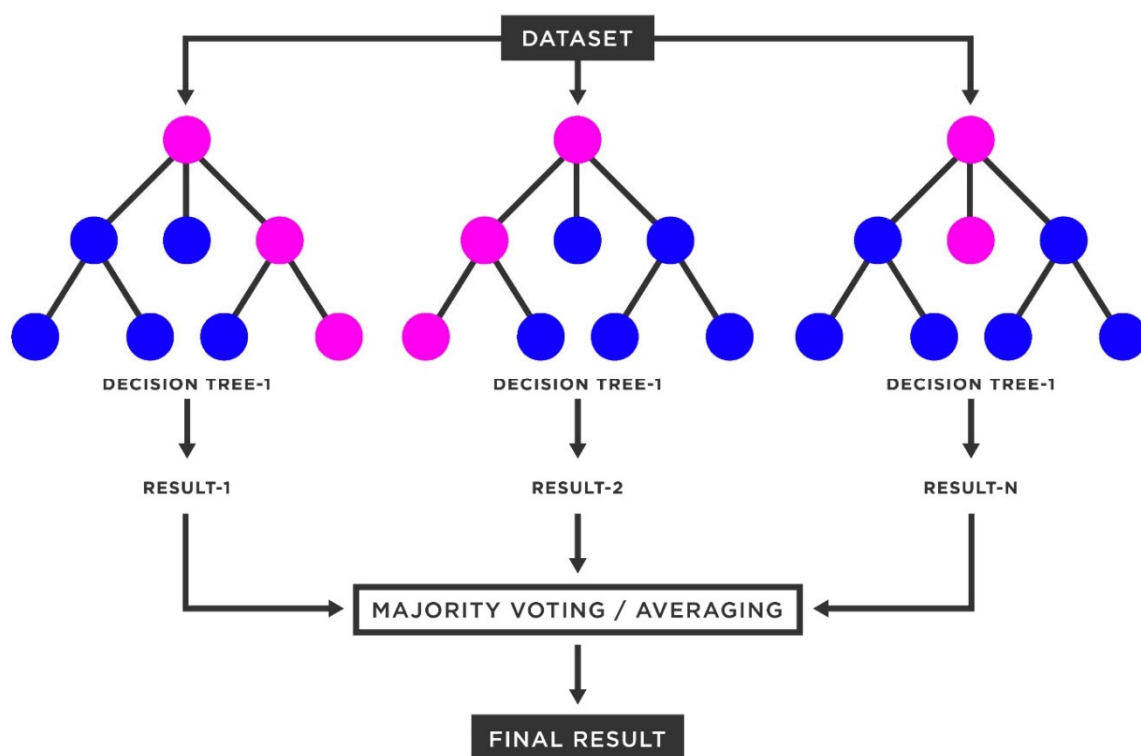

Figure S2. Schematic diagram of RF.

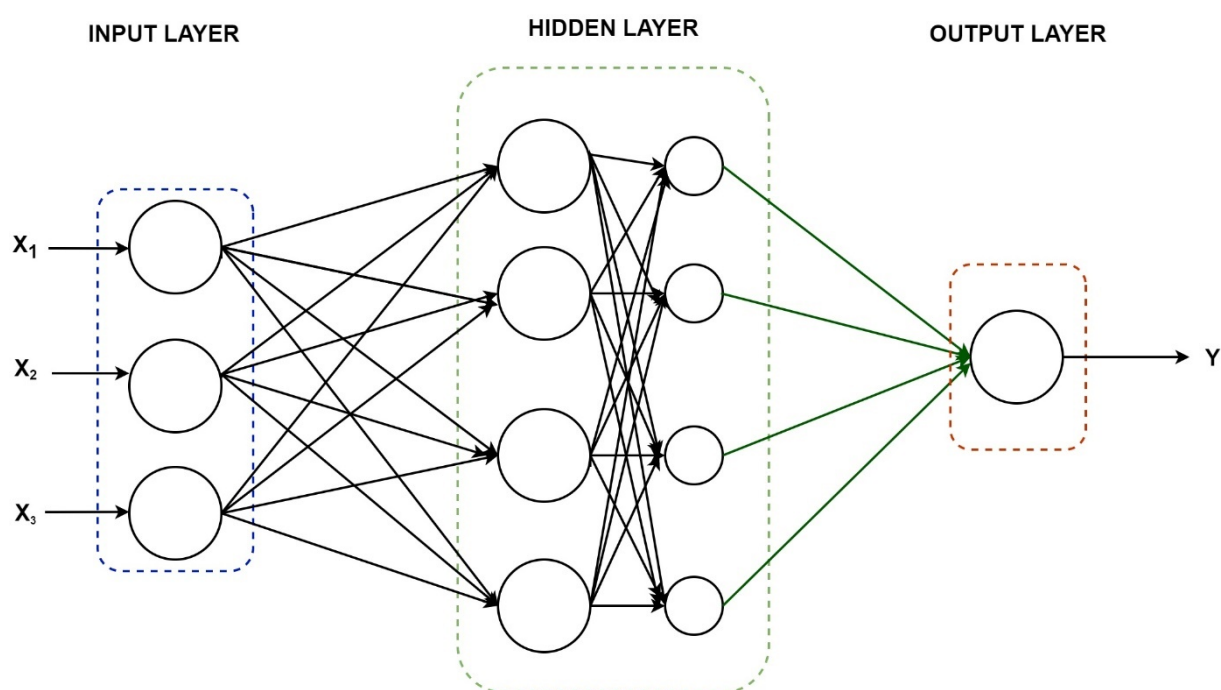

**Figure S3.** Schematic diagram of MLP.
